# Supplementary material for: Nanoarchitectonics of Spherical Nucleic Acids with Biodegradable Polymer Cores: Synthesis and Evaluation
Source: MDPI journal article supplement (doi:10.3390/ma15248917), 2022-12-13
Supplement: s1 [file s1]

# Supplementary Materials

## Nanoarchitectonics of Spherical Nucleic Acids with Biodegradable Polymer Cores: Synthesis and Evaluation

Radostina Kalinova <sup>1,\*</sup>, Kirilka Mladenova <sup>2</sup>, Svetla Petrova <sup>2</sup>, Jordan Doumanov <sup>2</sup> and

Ivaylo Dimitrov <sup>1,\*</sup>

<sup>1</sup> *Institute of Polymers, Bulgarian Academy of Sciences, Akad. G. Bonchev St., bl. 103-A,  
1113 Sofia, Bulgaria;*

<sup>2</sup> *Faculty of Biology, Sofia University “St. Kliment Ohridski”, 8 Dragan Tzankov Blvd., 1164  
Sofia, Bulgaria*

\*Correspondence: kalinova@polymer.bas.bg; dimitrov@polymer.bas.bg

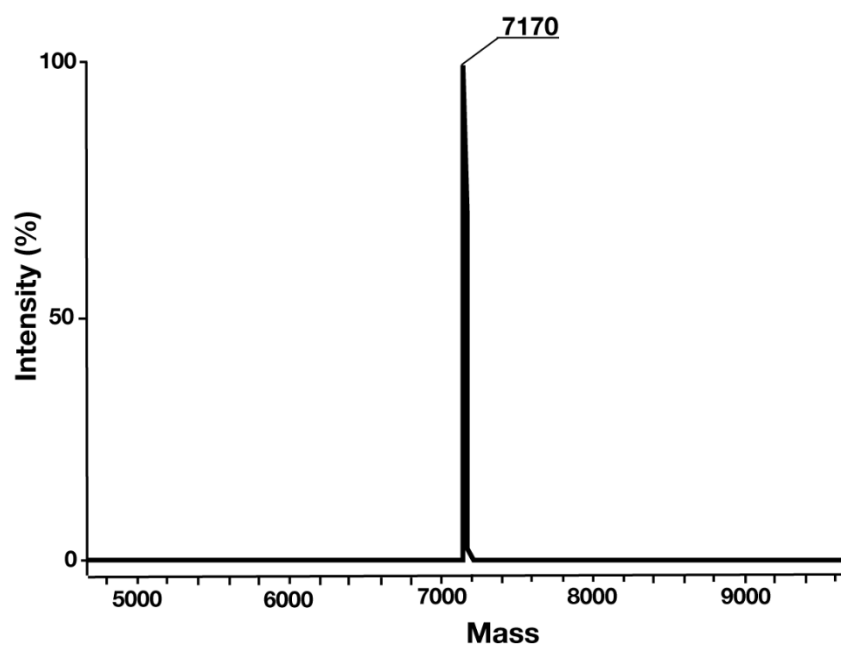

**Figure S1.** MALDI-TOF mass spectrum of oligonucleotide with the following composition (5'→3'): DBCO-(EG)<sub>4</sub>-(spacer 18)<sub>1</sub> ta ata cga ctc act ata ggg (DBCO-PEG-oligo) supplied by Biomers.net GmbH.

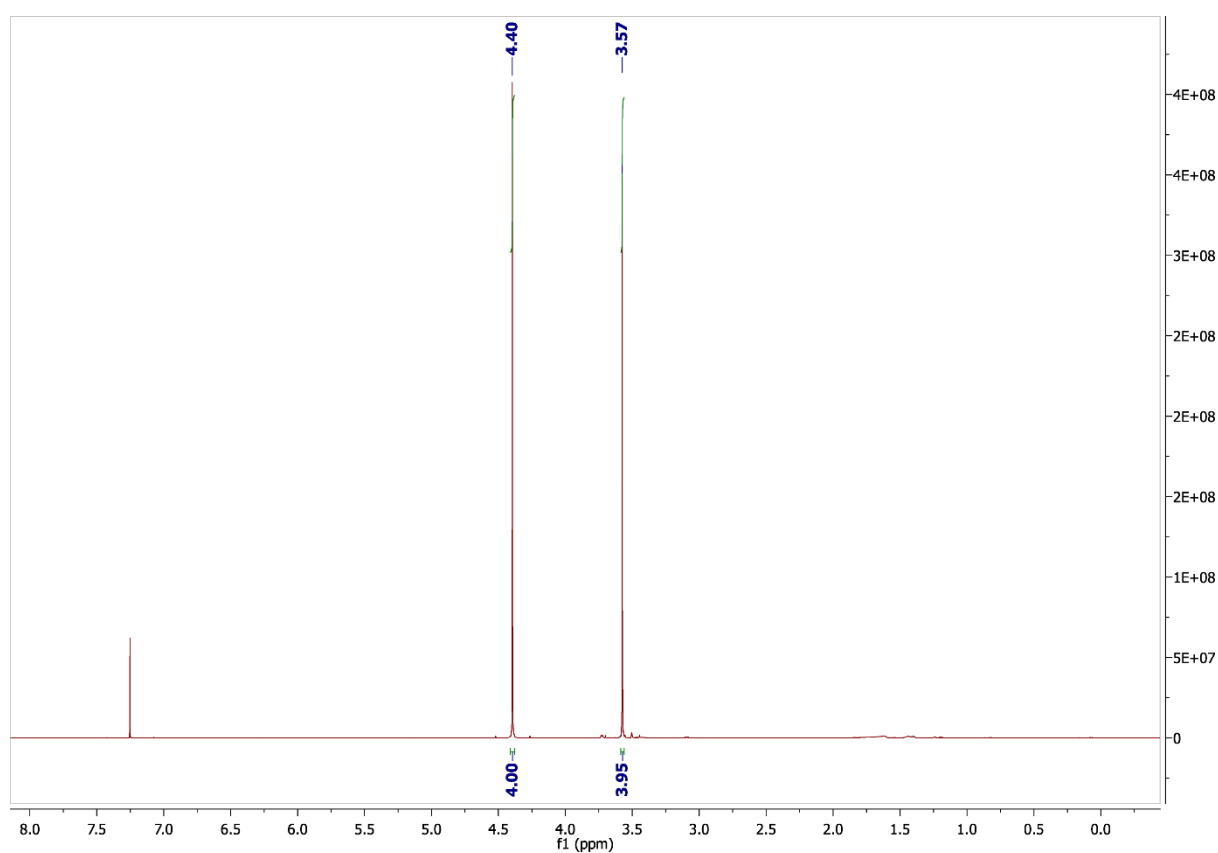

**Figure S2.** <sup>1</sup>H NMR (600 MHz) spectrum in CDCl<sub>3</sub> of 2,2-bis(bromomethyl) trimethylene carbonate (BMTC) monomer.

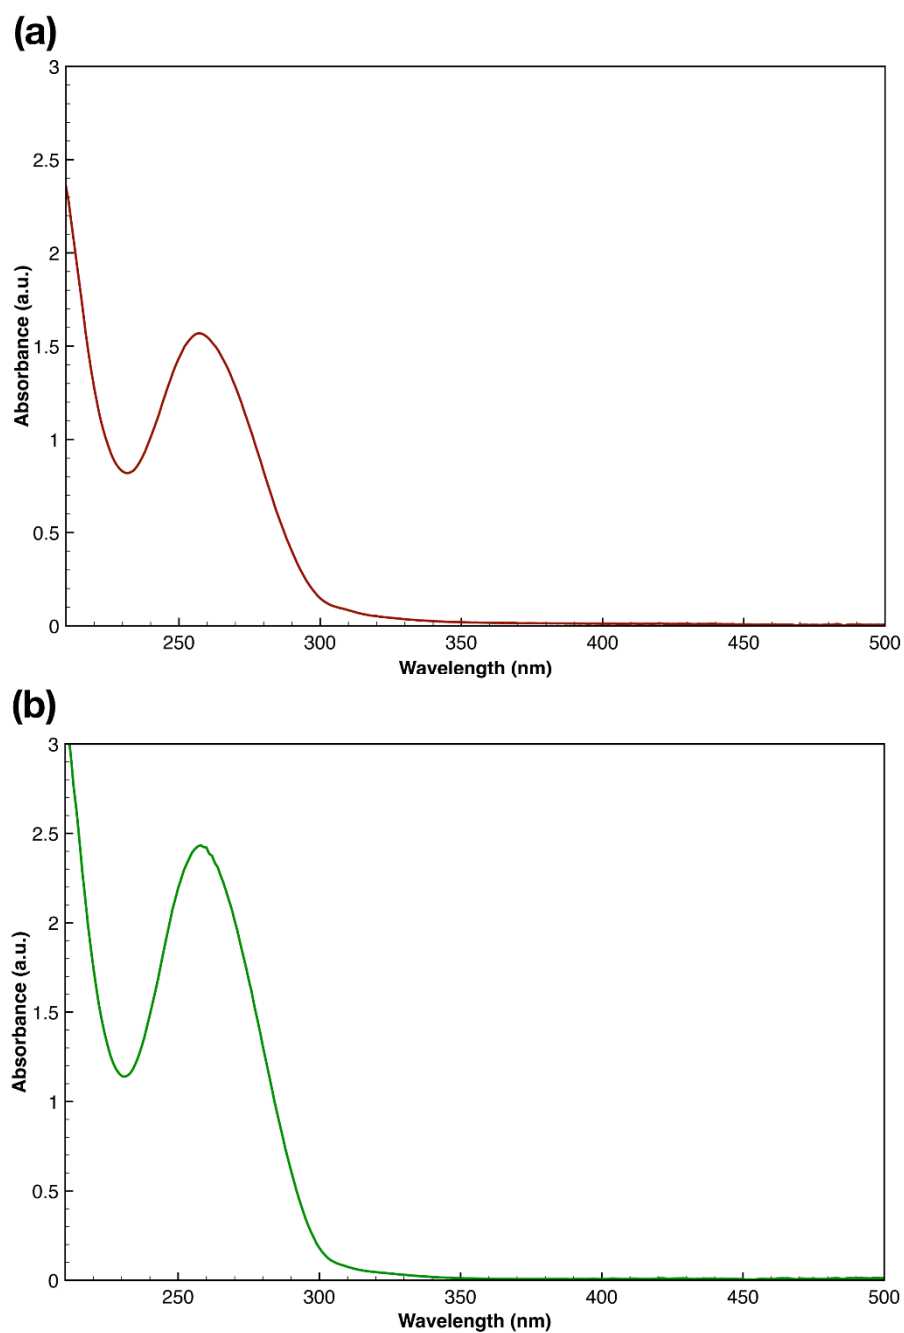

**Figure S3.** UV/Vis absorption spectra in aqueous media of: **(a)** poly(D,L-lactide)-based spherical nucleic acids (PLA-SNA); **(b)** poly(D,L-lactide)-*co*-polycarbonate-based spherical nucleic acids (PLA-*co*-PC-SNA).
